# Supplementary material
Source: PubMed Central journal article supplement (PMC7939043)

**A**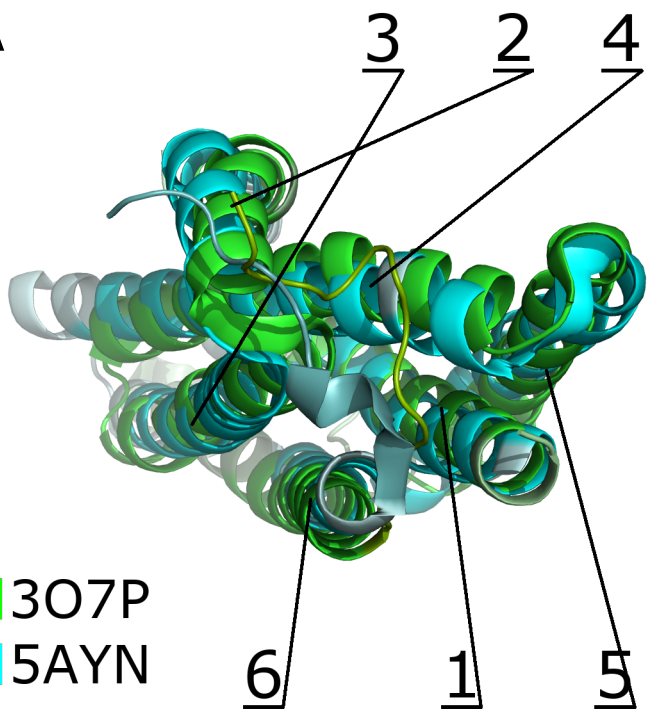

307P  
5AYN

**B**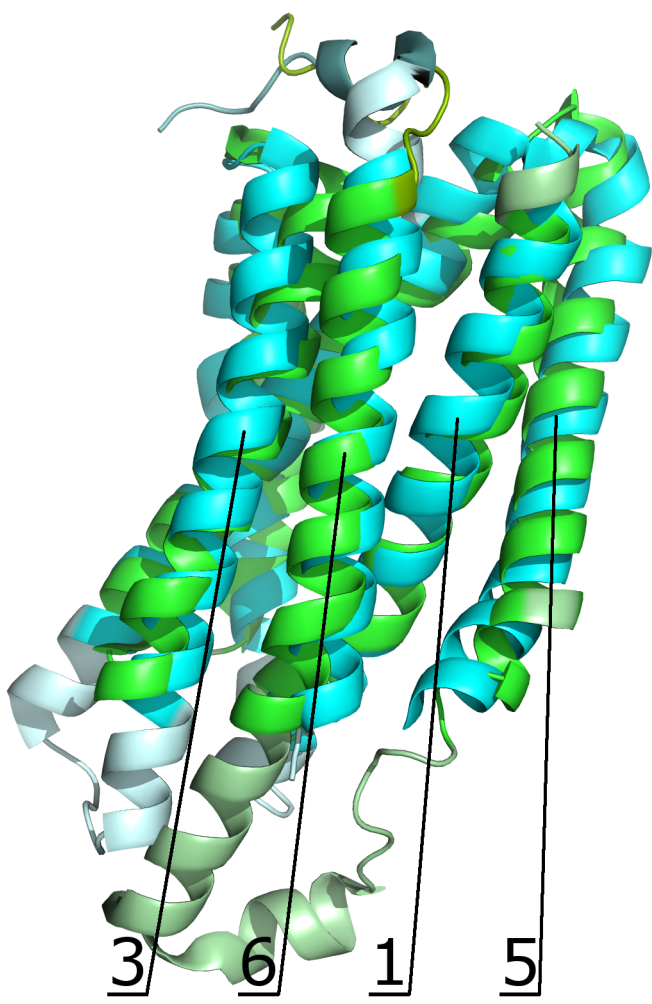

Supplement: NIHMS1598442-supplement-10.pdf [file NIHMS1598442-supplement-10.pdf]

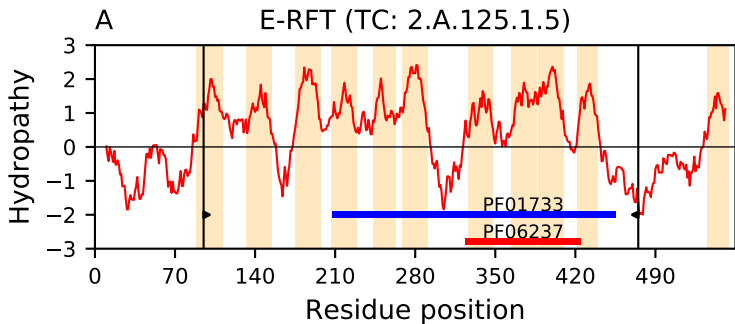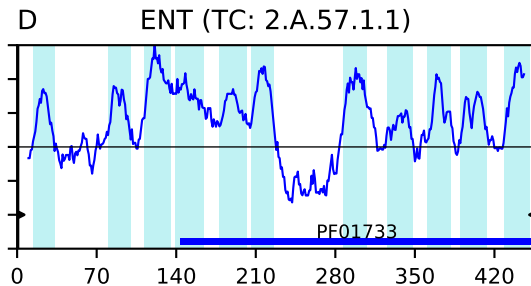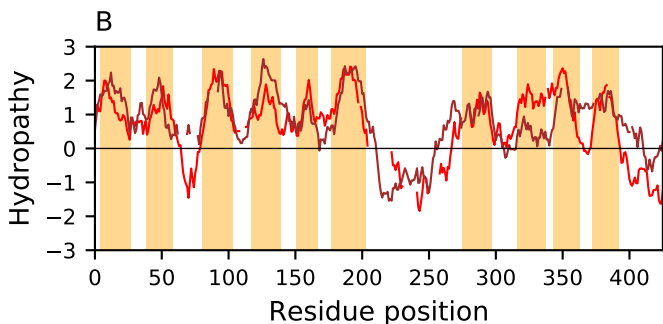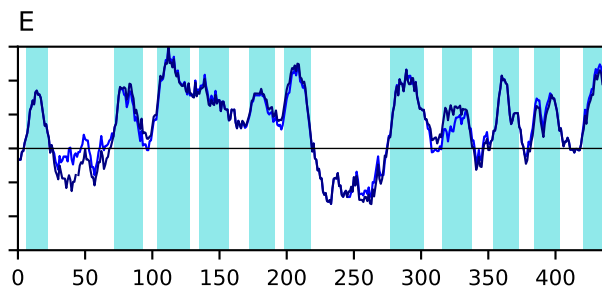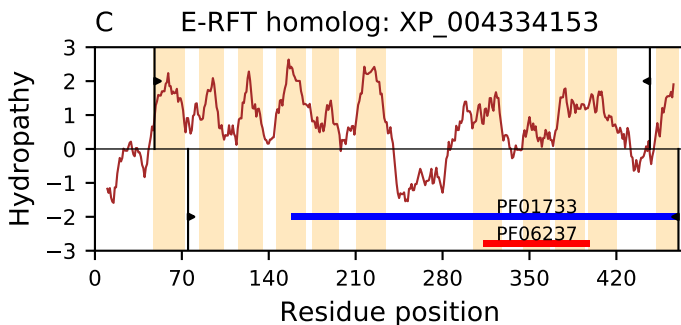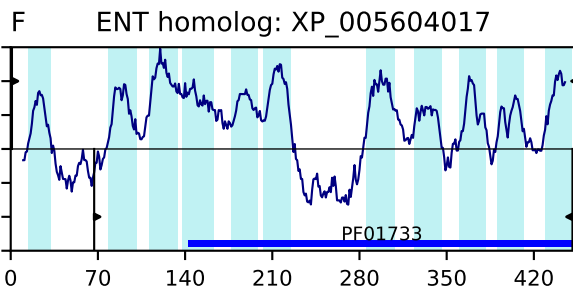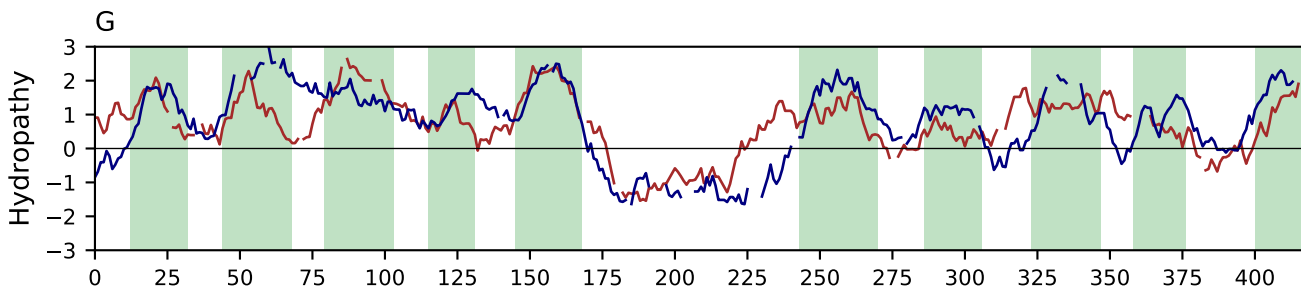

Supplement: NIHMS1598442-supplement-11.pdf [file NIHMS1598442-supplement-11.pdf]

**A**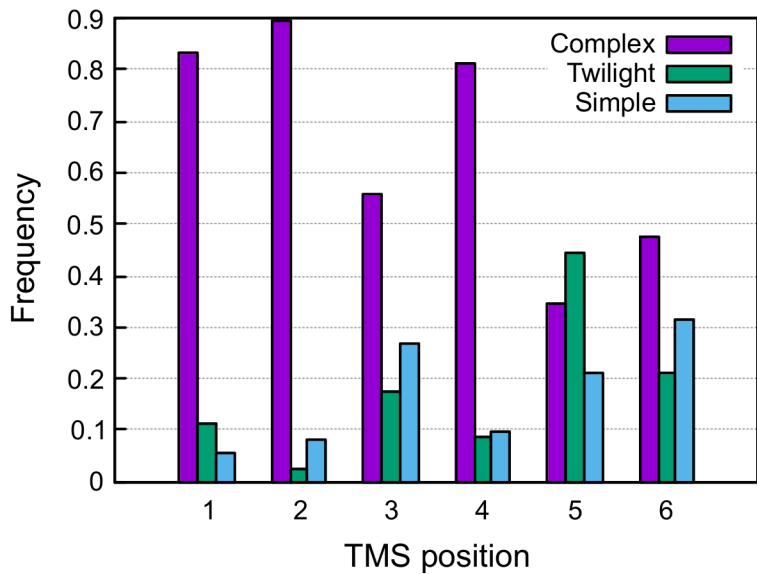**B**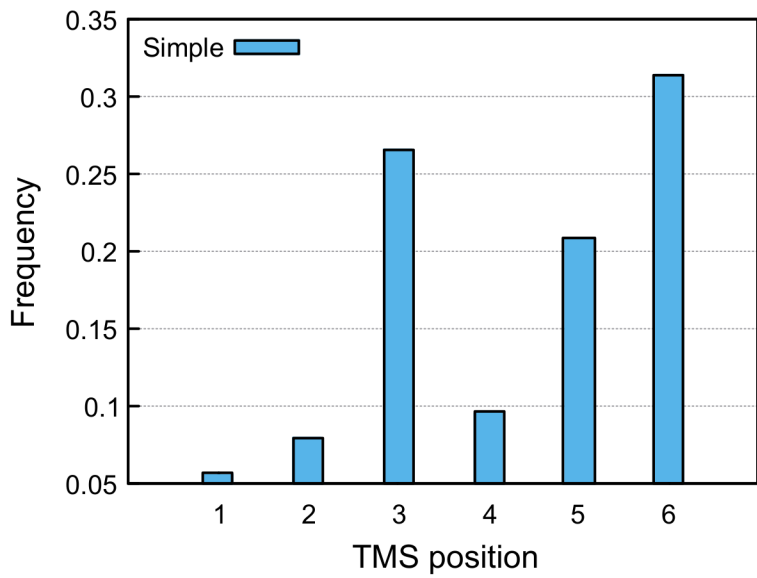

Supplement: NIHMS1598442-supplement-13.pdf [file NIHMS1598442-supplement-13.pdf]

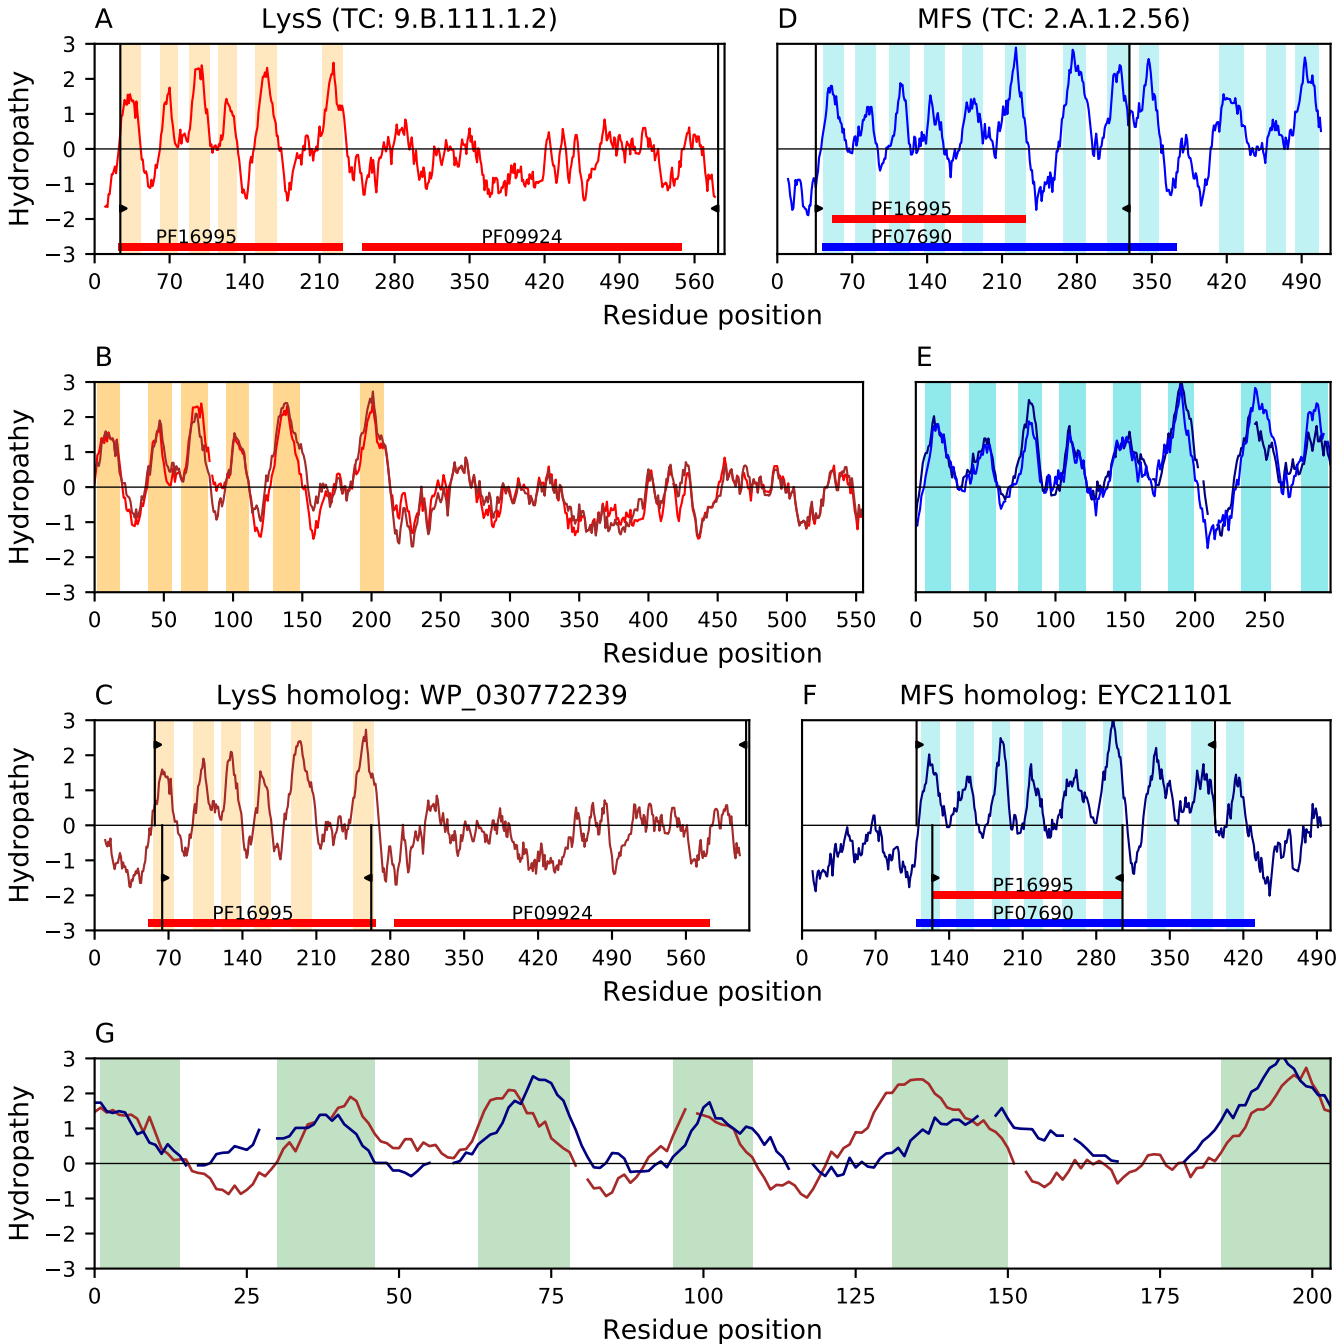

Supplement: NIHMS1598442-supplement-14.pdf [file NIHMS1598442-supplement-14.pdf]

**A**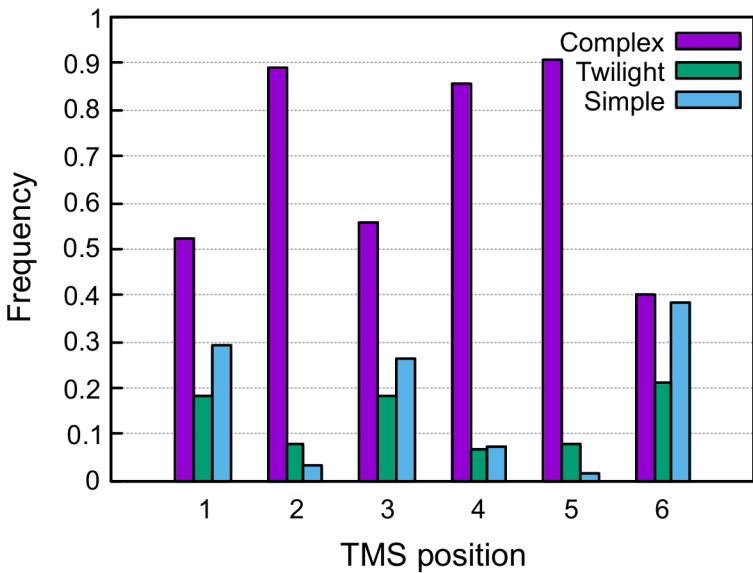**B**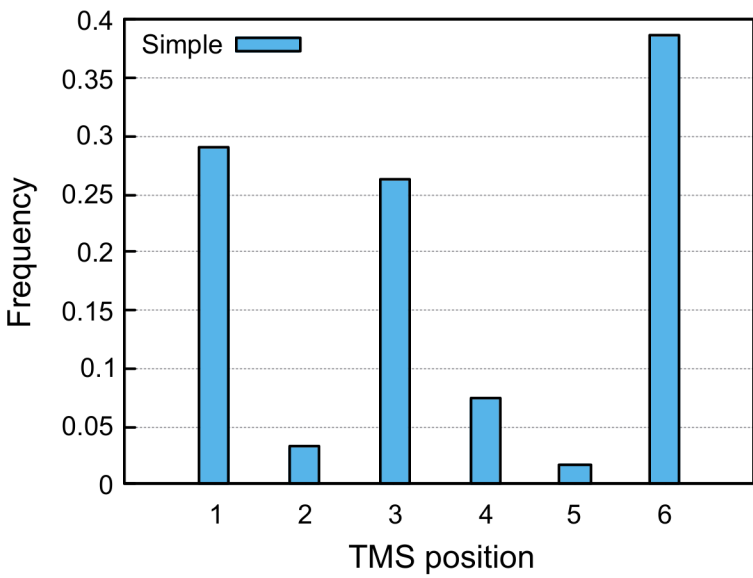

Supplement: NIHMS1598442-supplement-16.pdf [file NIHMS1598442-supplement-16.pdf]

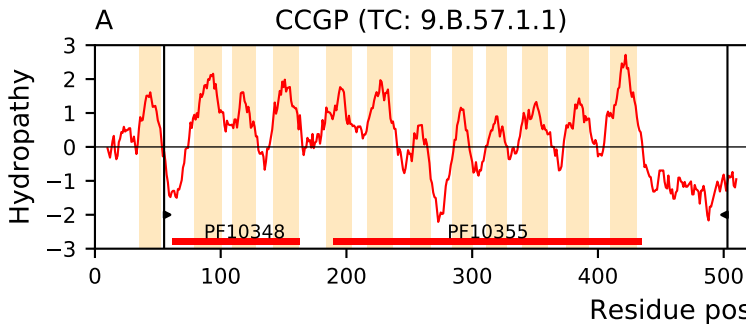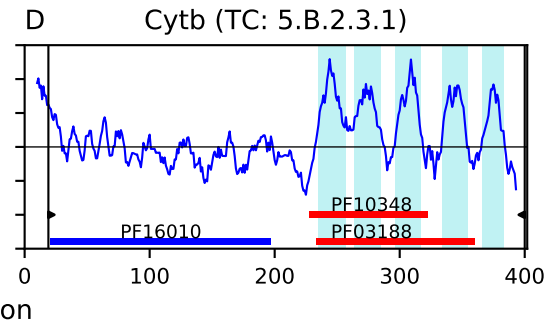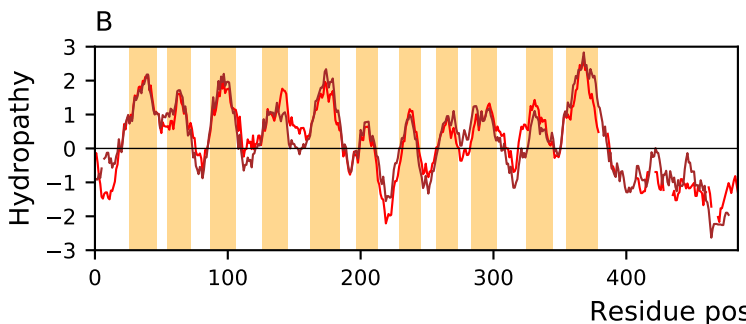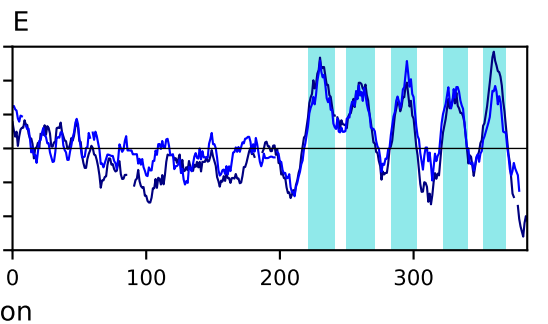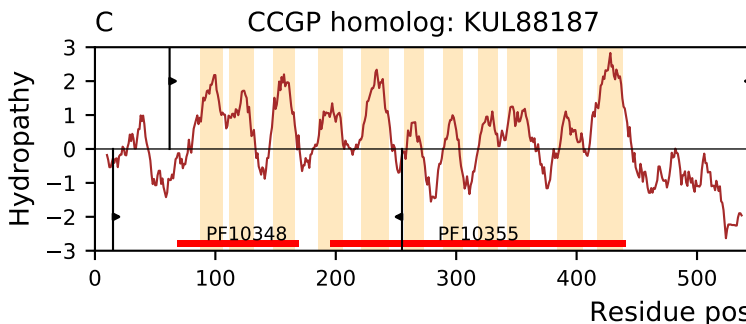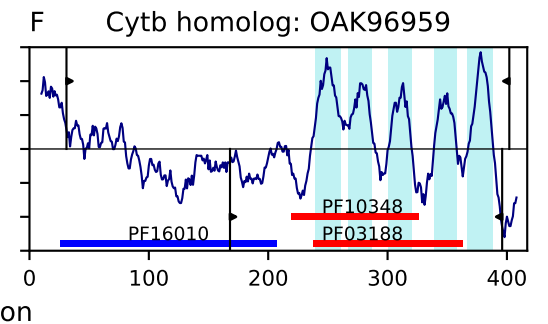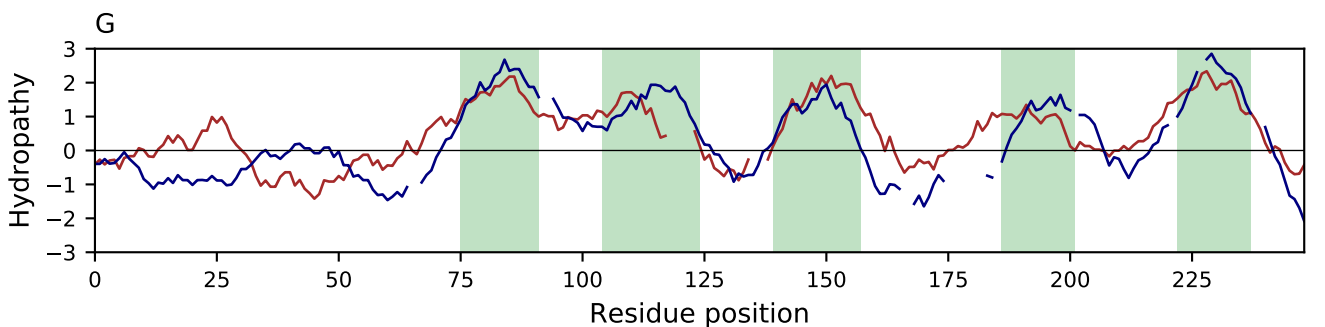

Supplement: NIHMS1598442-supplement-17.pdf [file NIHMS1598442-supplement-17.pdf]

**A** DUF1275 (TC: 9.B.143.2.3)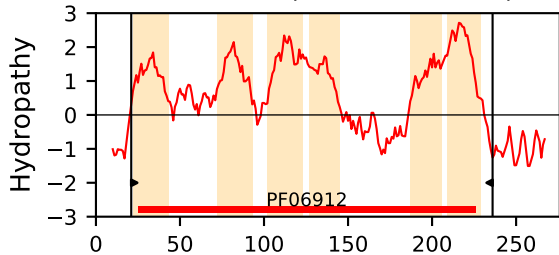**D** MFS (TC: 2.A.1.2.75)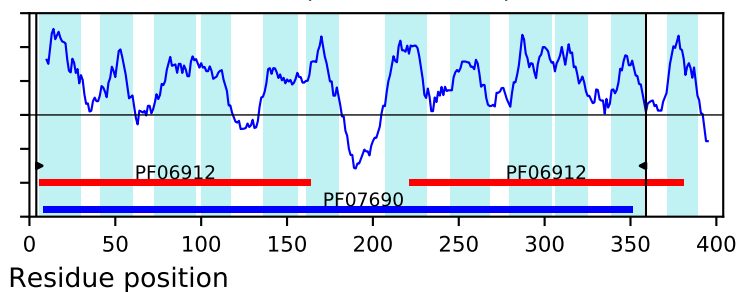**B**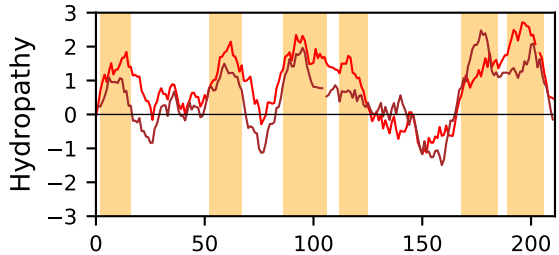**E**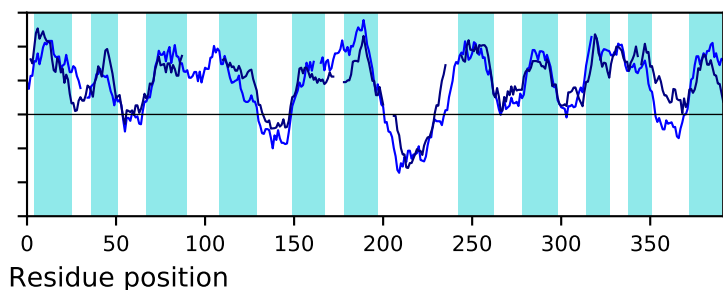**C** DUF1275: WP\_003499261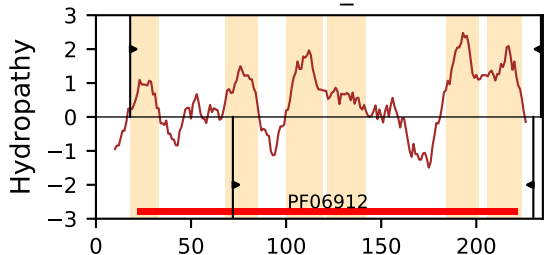**F** MFS homolog: WP\_015325006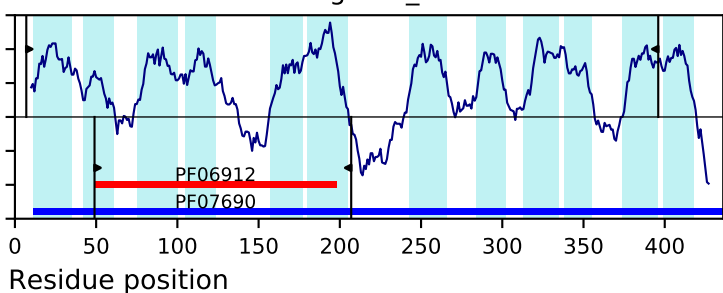**G**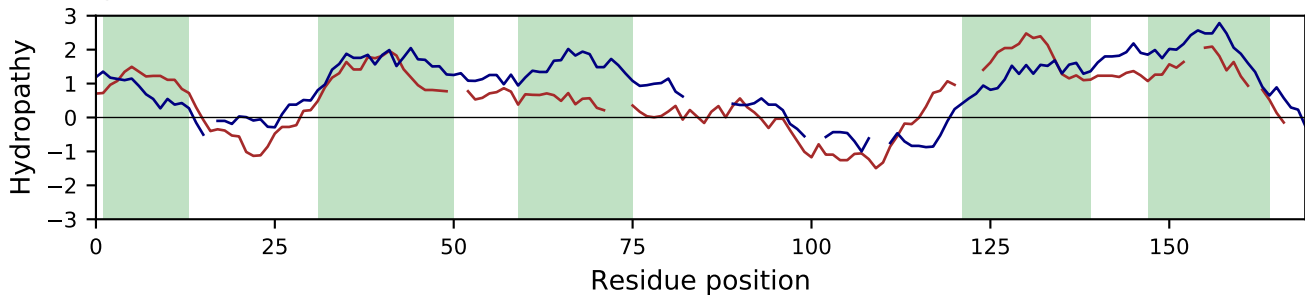

Supplement: NIHMS1598442-supplement-18.pdf [file NIHMS1598442-supplement-18.pdf]

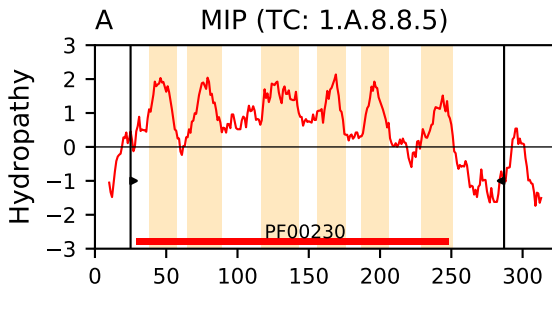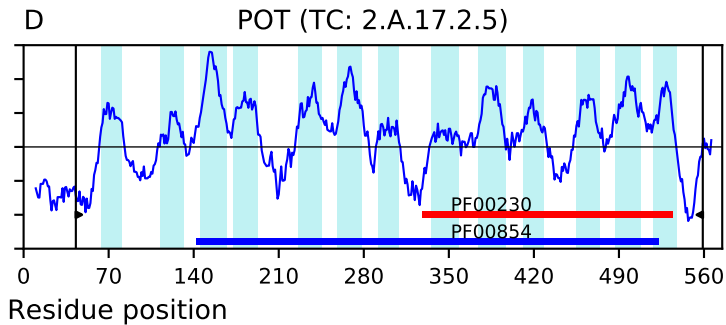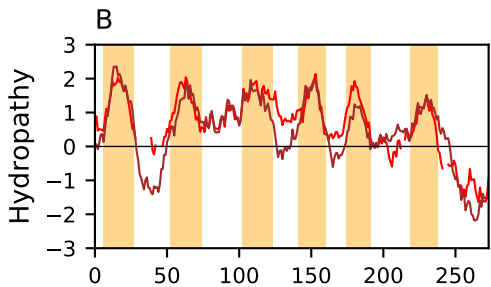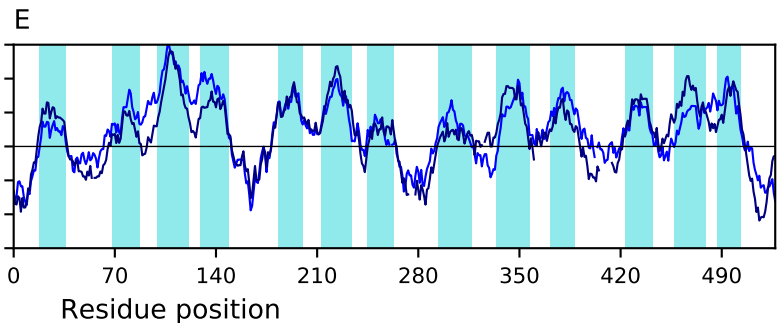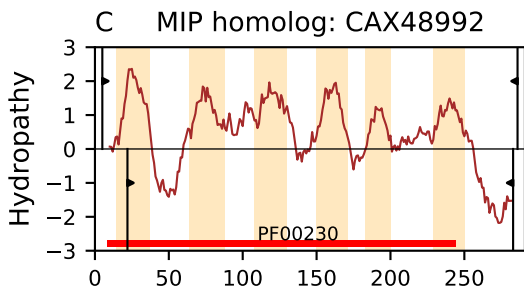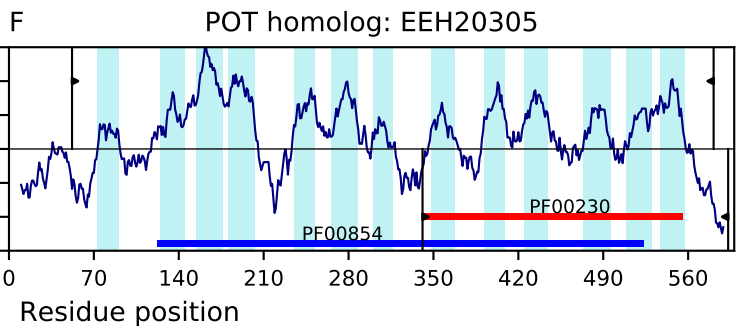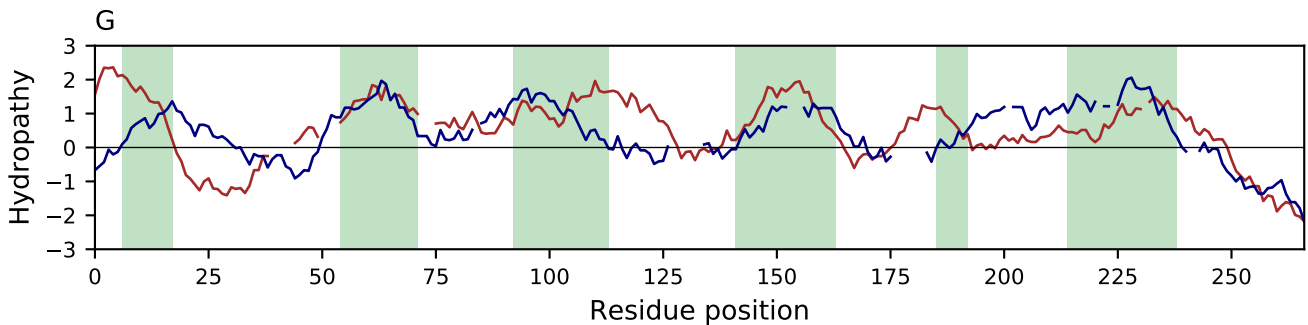

Supplement: NIHMS1598442-supplement-19.pdf [file NIHMS1598442-supplement-19.pdf]

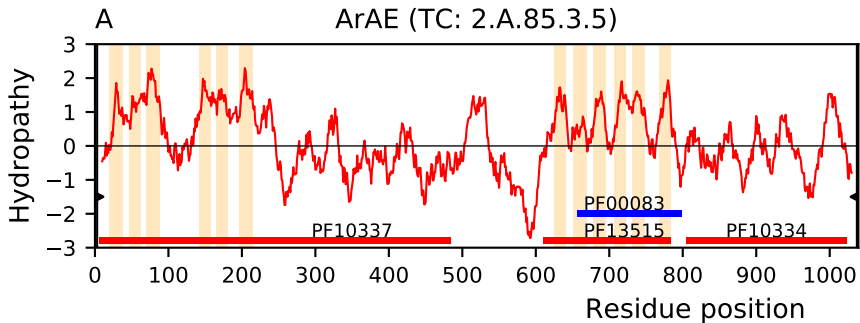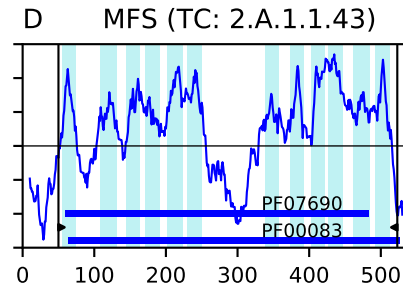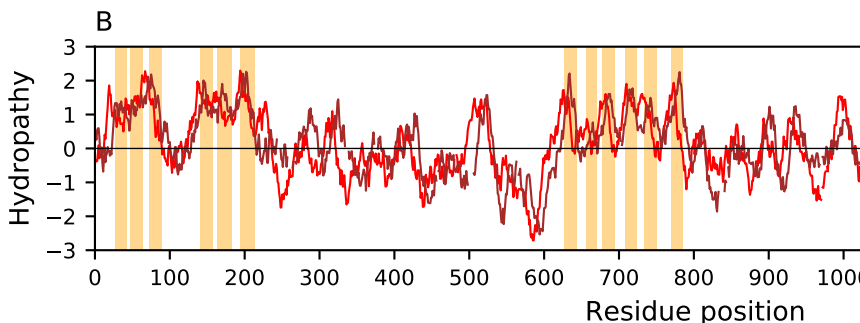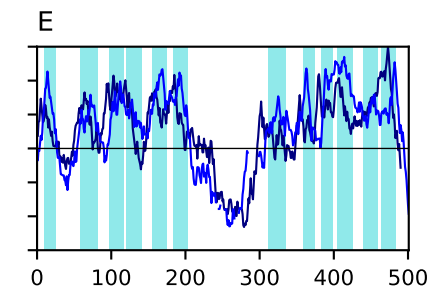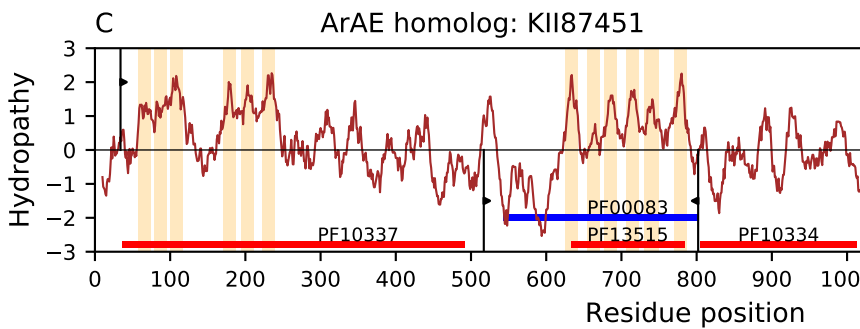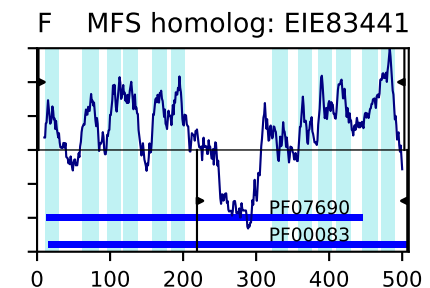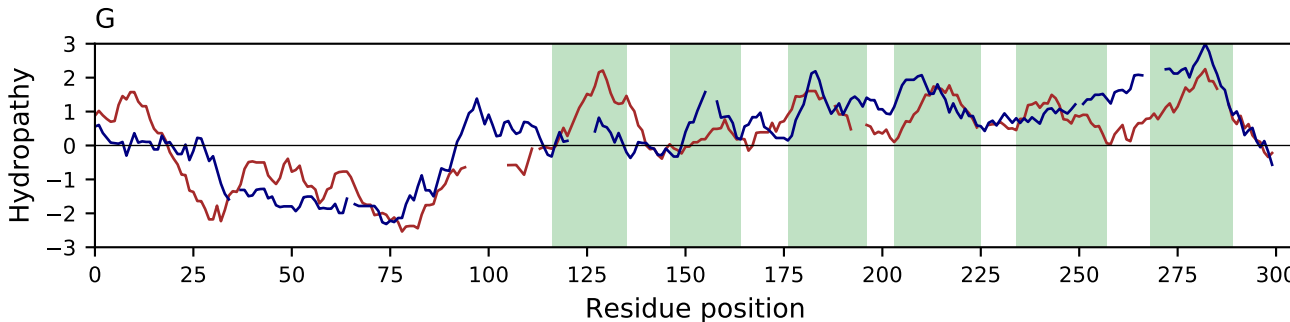

Supplement: NIHMS1598442-supplement-4.pdf [file NIHMS1598442-supplement-4.pdf]

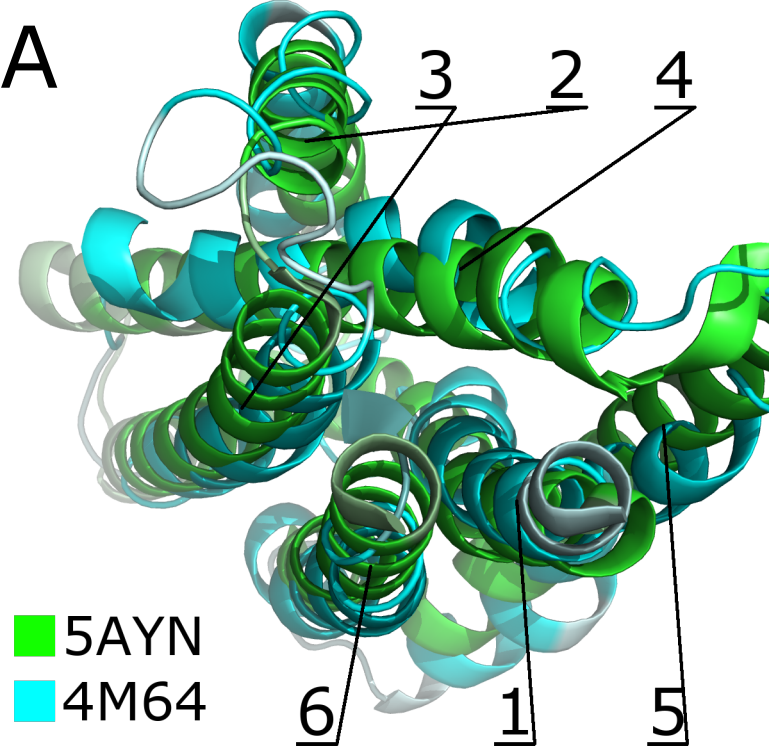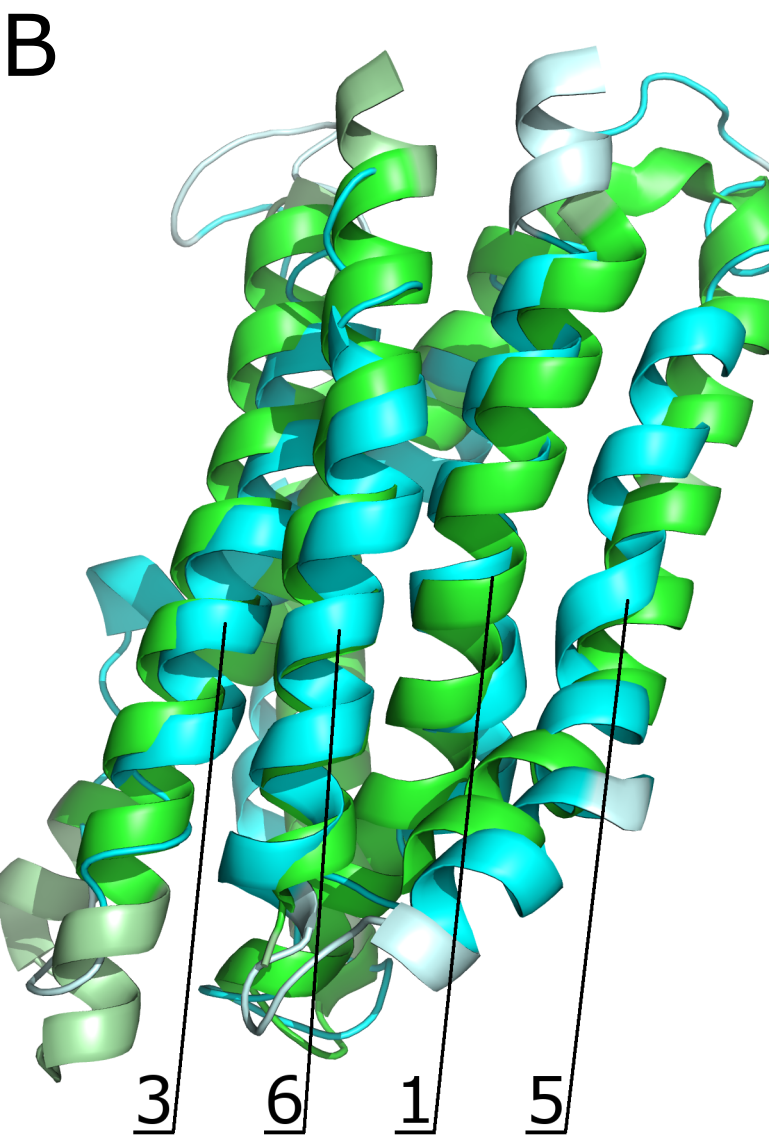

Supplement: NIHMS1598442-supplement-8.pdf [file NIHMS1598442-supplement-8.pdf]

**A**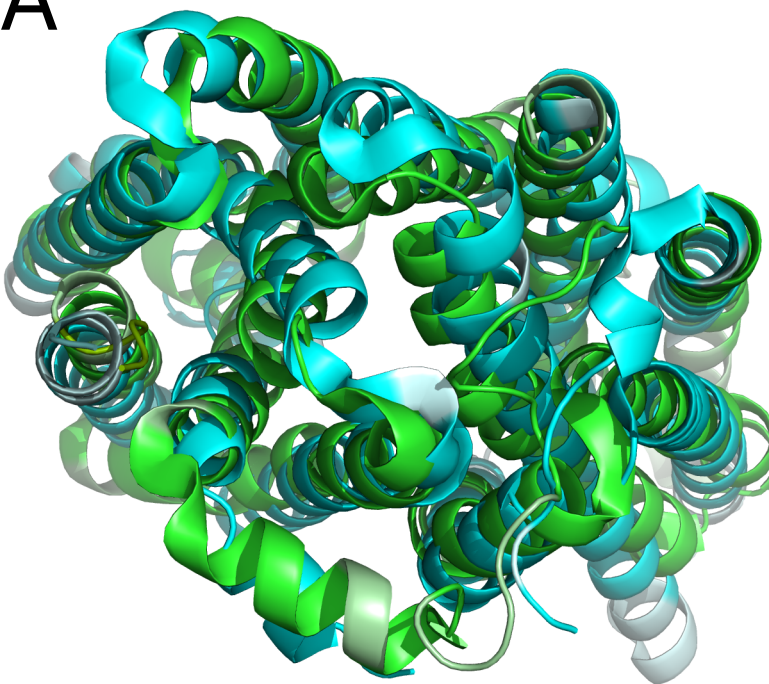**B**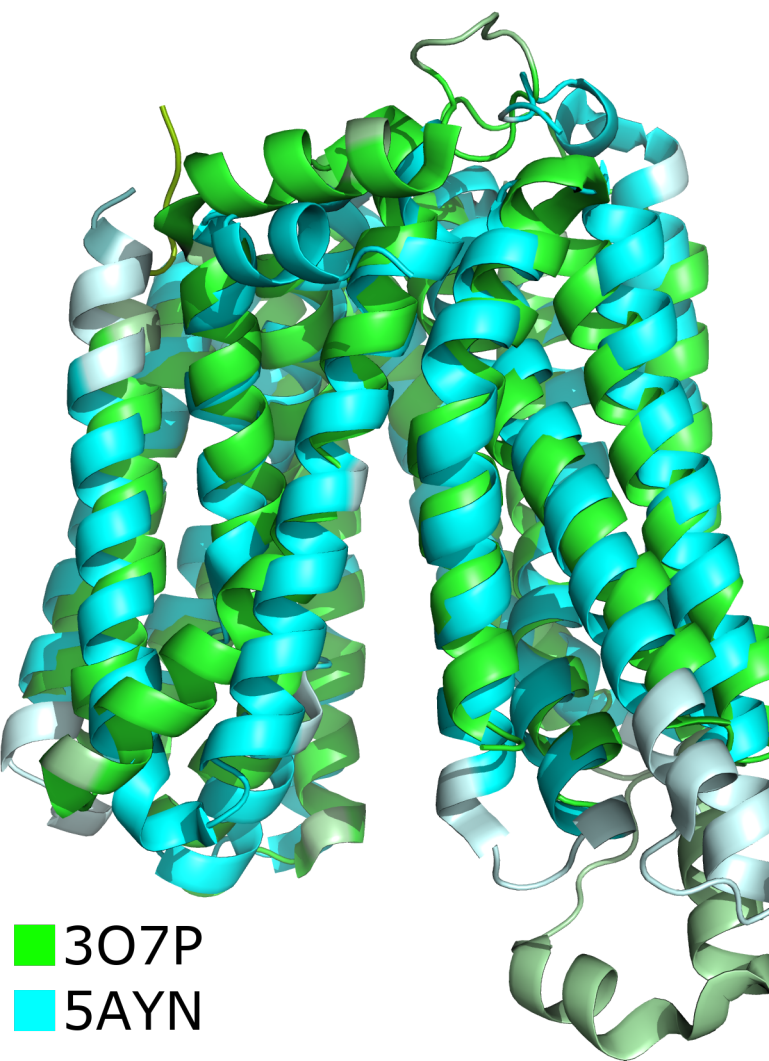

■ 307P

■ 5AYN

Supplement: NIHMS1598442-supplement-9.pdf [file NIHMS1598442-supplement-9.pdf]
